# Supplementary material for: Investigating the Performance of Efficient and Stable Planer Perovskite Solar Cell with an Effective Inorganic Carrier Transport Layer Using SCAPS-1D Simulation
Source: MDPI journal article supplement (doi:10.3390/en16217438), 2023-11-03
Supplement: s1 [file s1]

Archive with 1 entries (1 files):
- energies-2655057-supplementary.pdf
