# Supplementary material for: Investigating the Performance of Efficient and Stable Planer Perovskite Solar Cell with an Effective Inorganic Carrier Transport Layer Using SCAPS-1D Simulation
Source: MDPI journal article supplement (doi:10.3390/en16217438), 2023-11-03
Supplement: s1 [file s1 › energies-2655057-supplementary.pdf]

## Supplementary Materials

To

### **Investigating the Performance of Efficient and Stable Planer Perovskite Solar Cell with an Effective Inorganic Carrier Transport Layer Using SCAPS-1D Simulation**

Safdar Mehmood <sup>1,2</sup>, Yang Xia <sup>1,2,3,4,\*</sup>, Furong Qu <sup>1,2,\*</sup> and Meng He <sup>1,2</sup>

<sup>1</sup> Institute of Microelectronics of Chinese Academy of Sciences, Beijing 100029, China;  
safdar@ime.ac.cn (S.M.); hemeng@ime.ac.cn (M.H.)

<sup>2</sup> University of Chinese Academy of Sciences, Beijing 100049, China

<sup>3</sup> University of Science and Technology of China, Hefei 230026, China

<sup>4</sup> Suzhou Institute for Advanced Research, University of Science and Technology of  
China, Suzhou 215123, China

\* Correspondence: xiayang@ime.ac.cn (Y.X.); qufurong@ime.ac.cn (F.Q.); Tel.: +86-  
136-1121-8429 (Y.X.)

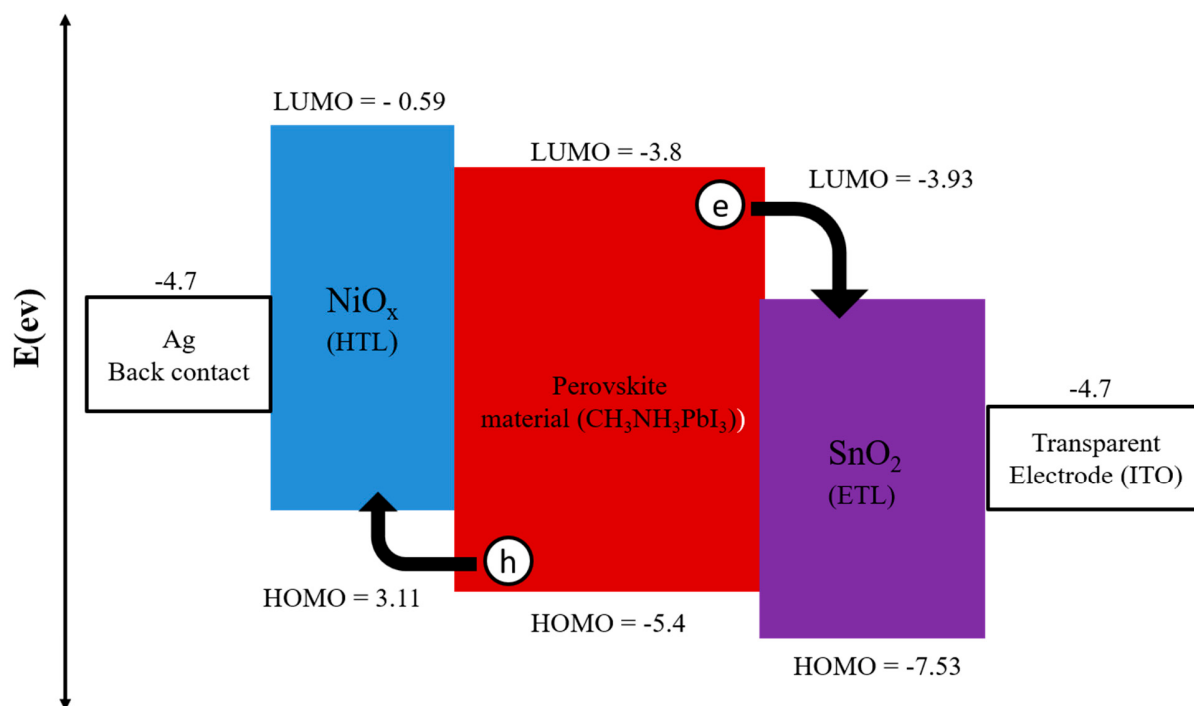

**Figure S1.** Band alignment diagram

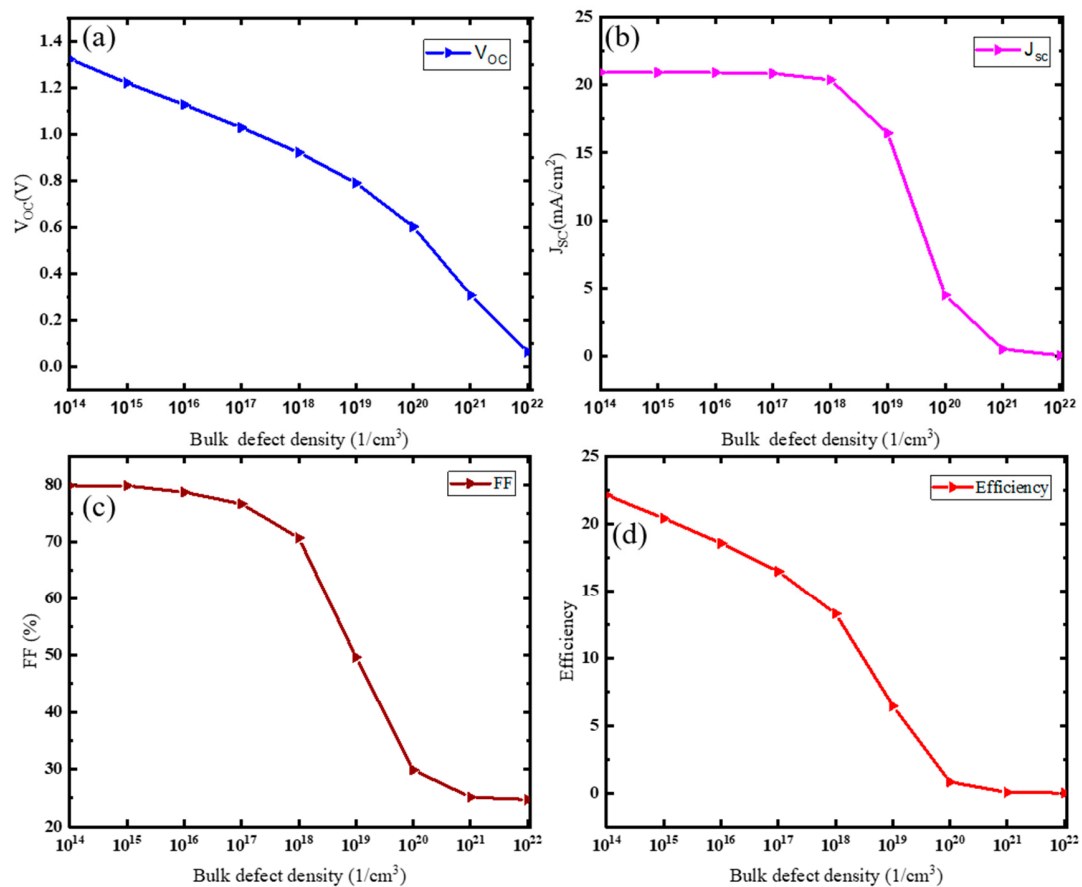

**Figure S2.** Effect of bulk defects in the cell structure

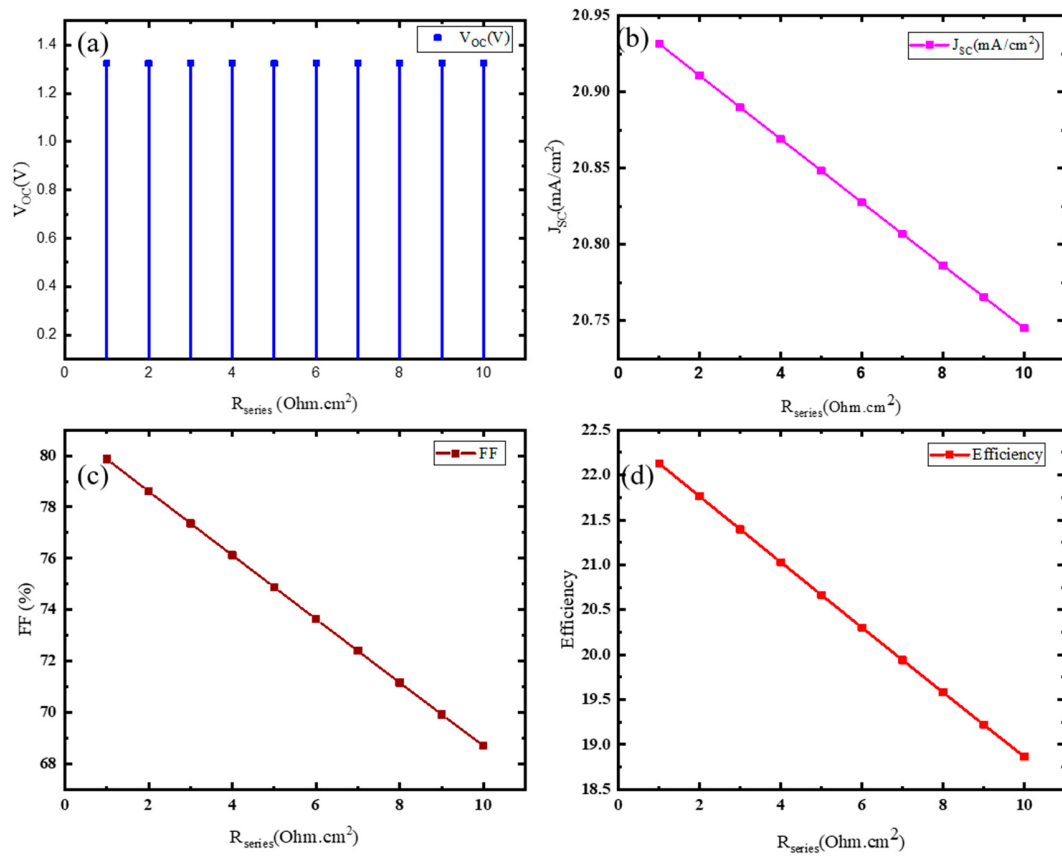

**Figure S3.** Effect of series resistance

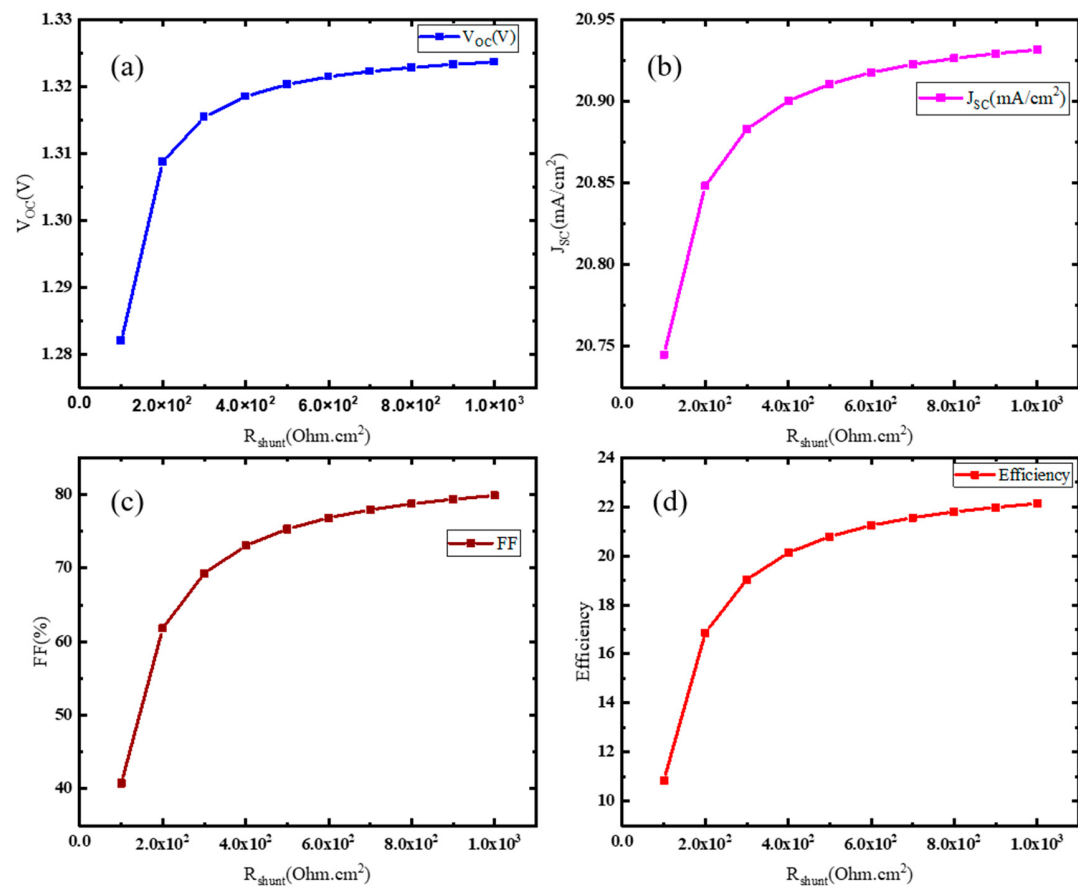

Figure S4. Effect of shunt resistance
